# Supplementary material
Source: PubMed Central journal article supplement (PMC6325173)

**Figure S1.** Schematic representation of the study protocol

Verification of the bacterial inoculum (CFU count on Mueller-Hinton medium after serial dilution)

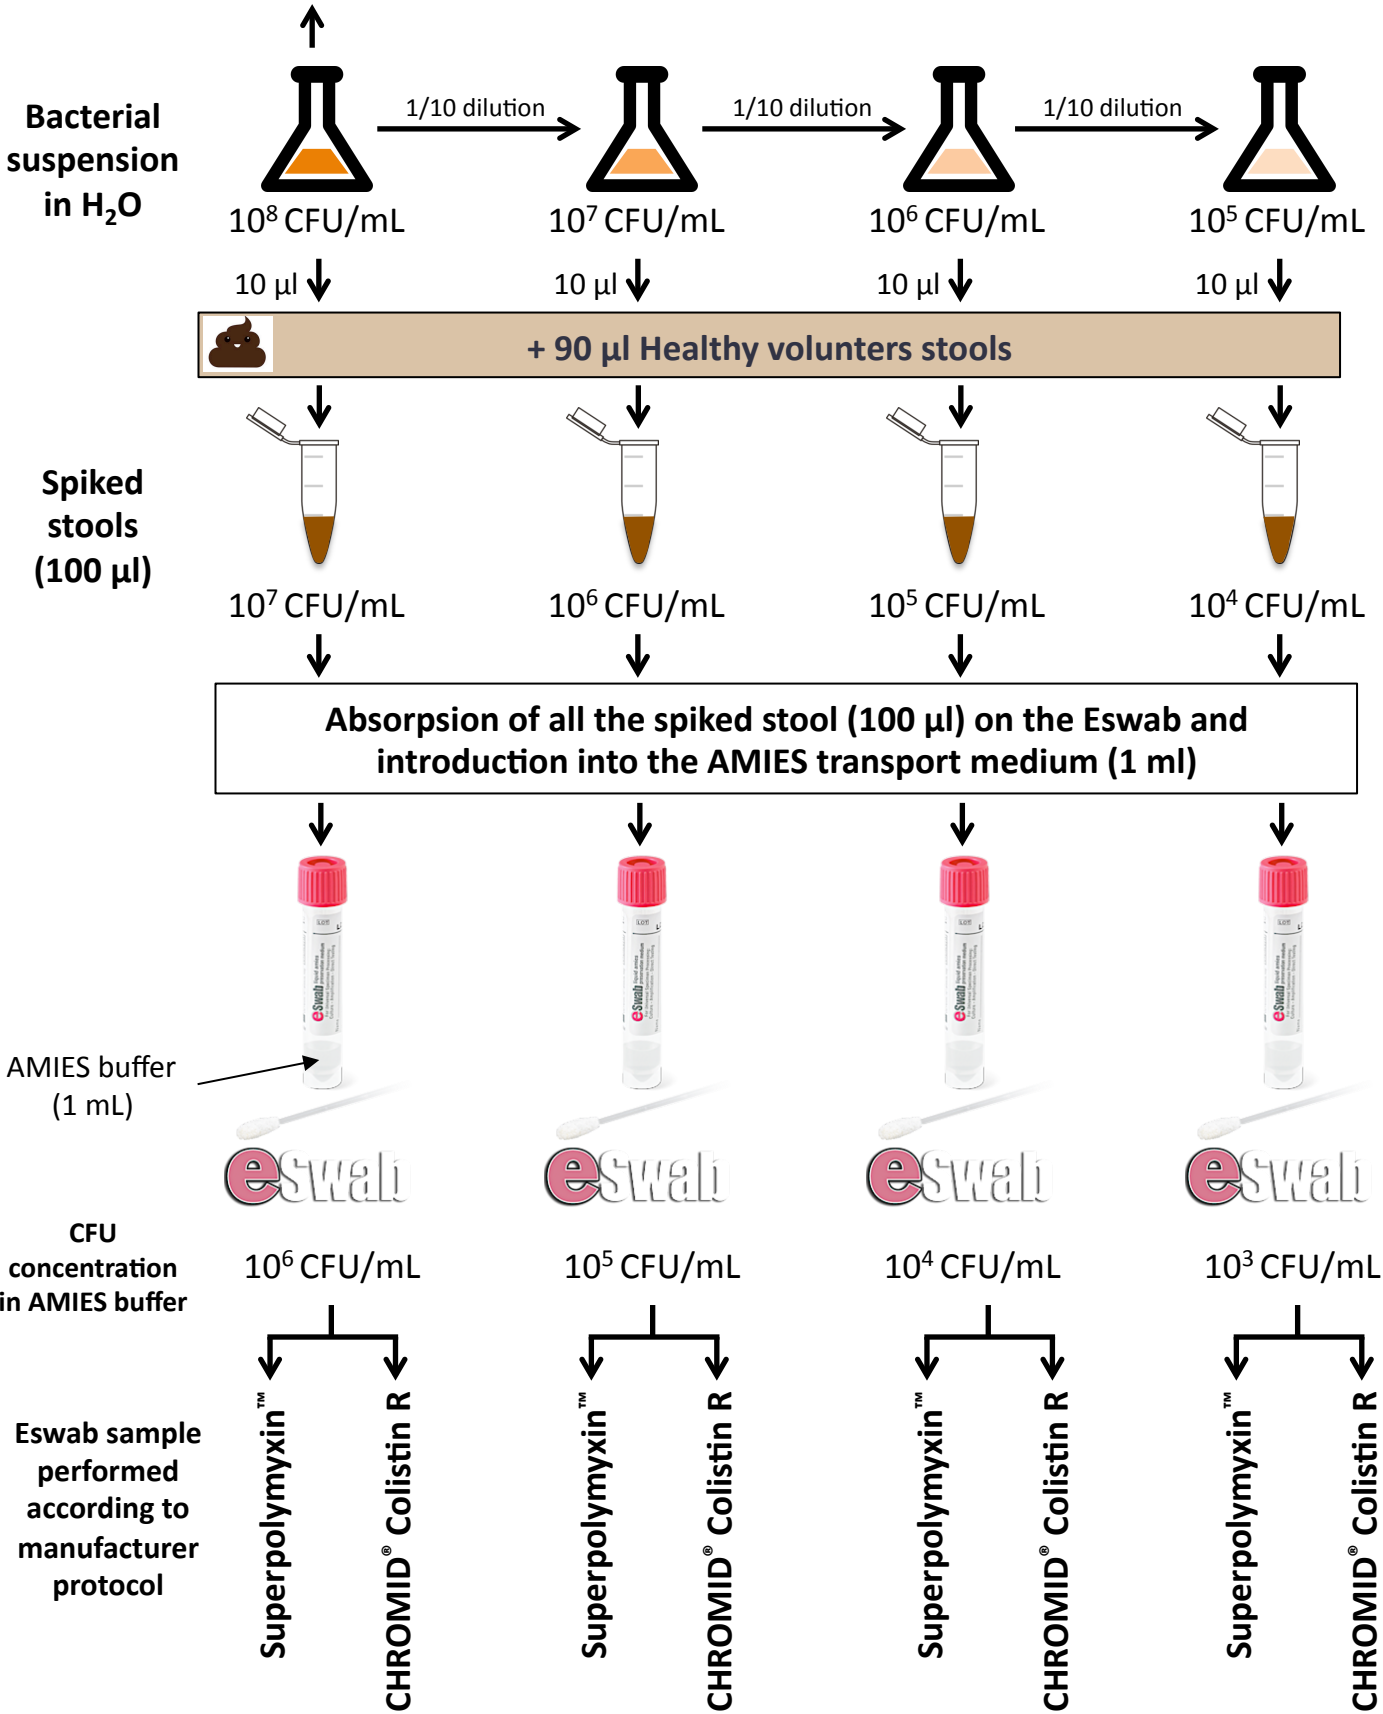

Supplement: 2e3026724341d158f9d2308997d1117c_AAC.01618-18-s0001.pdf [file 2e3026724341d158f9d2308997d1117c_AAC.01618-18-s0001.pdf]
